# Supplementary material
Source: MDPI journal article supplement (https://www.mdpi.com/2073-4433/13/10/1597)
Supplement: s1 [file s1]

## Supplementary Materials:

# The Spatial Variation of the Influence of Lockdown on Air Quality across China and Its Major Influencing Factors during COVID-19

Jing Yang <sup>1</sup>, Xiao Chen <sup>1</sup>, Qi Yao <sup>1</sup>, Manchun Li <sup>2</sup>, Miaoqing Xu <sup>1</sup>, Qiancheng Lv <sup>1</sup>, Bingbo Gao <sup>3</sup> and Ziyue Chen <sup>1,\*</sup>

<sup>1</sup> College of Global and Earth System Sciences, Beijing Normal University, 19 Xijiekou Street, Haidian, Beijing 100875, China

<sup>2</sup> School of Geography and Ocean Science, Nanjing University, Nanjing 210023, China

<sup>3</sup> College of Land Science and Technology, China Agricultural University, Beijing 100083, China

\* Correspondence: to: zyuchen@bnu.edu.cn.

**Table S1. Start and end dates and measures for 55 cases across China**

| City         | Start time and measures                                                                                                                                                                              | Ending time and measures                                                                                                         |
|--------------|------------------------------------------------------------------------------------------------------------------------------------------------------------------------------------------------------|----------------------------------------------------------------------------------------------------------------------------------|
| Wuhan        | January 23, 2020 Wuhan city closure; bus, subway, ferry, long-distance passenger transport shutdown; airport, railway station and other channels to close the Han                                    | April 8, 2020 Release the control measures of the Han channel and restore the external traffic in an orderly manner              |
| Jilin        | May 11, 2020 Jilin City enters a state of war, the risk level of the infected area involved is adjusted to medium risk, and the gathering place is closed                                            | June 7, 2020 Territory-wide low risk                                                                                             |
| Beijing      | June 11, 2020 Beijing Fengtai Xinfadi wholesale market outbreak, the city's secondary prevention and control measures, cultural, sports and entertainment venues closed                              | July 20, 2020 The whole area is downgraded to three levels of prevention and control                                             |
| Wulumuqi     | July 17, 2020 Urumqi begins week-long closure with massive flight cancellations, subway closures and more                                                                                            | August 29, 2020 Territory-wide low risk                                                                                          |
| Dalian       | July 25, 2020 Gathering places are closed; the city's kindergartens are suspended; airports and train stations must have proof of nucleic acid, and bus terminals are suspended from selling tickets | August 16, 2020 Gathering places to resume business; resume group meal operations in the city; resume passenger transport routes |
| Shanwei      | August 15, 2020 The risk level was adjusted upward, and the gathering place was suspended from business                                                                                              | August 28, 2020 Key villages are released from control and the whole area is low risk                                            |
| Qingdao      | October 11, 2020 The risk level was adjusted upward, and the gathering place was suspended from business                                                                                             | October 25, 2020 Territory-wide low risk                                                                                         |
| Tianjin      | November 8, 2020 Tianjin City enters a state of war                                                                                                                                                  | December 5, 2020 Territory-wide low risk                                                                                         |
| Shanghai     | November 1, 2020 The risk level was adjusted upward, and the gathering place was suspended from business                                                                                             | December 8, 2020 Territory-wide low risk                                                                                         |
| Chengdu      | December 7, 2020 The risk level was adjusted upward, and the gathering place was suspended from business                                                                                             | December 22, 2020 Territory-wide low risk                                                                                        |
| Beijing      | December 23, 2020 The risk level was adjusted upward, and the gathering place was suspended from business                                                                                            | January 19, 2021 Territory-wide low risk                                                                                         |
| Shenyang     | December 23, 2020 The city of Shenyang entered a state of war                                                                                                                                        | January 20, 2021 Adjusted to low risk                                                                                            |
| Shijiazhuang | January 5, 2021 Enter a state of war; primary and secondary schools and kindergartens to suspend offline teaching, the city's communities and rural areas to implement closed-loop management        | February 22, 2021 Adjusted to low risk                                                                                           |
| Xingtai      | January 5, 2021 Area-wide closure; public transportation ceased operations                                                                                                                           | February 8, 2021 Territory-wide low risk                                                                                         |
| Langfang     | January 12, 2021 Langfang city-wide closure management                                                                                                                                               | January 19, 2021 Except for Langfang City, Gu'an County, other areas returned to normal                                          |
| Suihua       | January 11, 2021 All communities, villages and towns closed management, gathering activities suspended; import and export closed, traffic control                                                    | February 22, 2021 Downgraded to low risk                                                                                         |

|             |                                                                                                                                                                                                                                                                                                                                 |                                                                                                                                     |
|-------------|---------------------------------------------------------------------------------------------------------------------------------------------------------------------------------------------------------------------------------------------------------------------------------------------------------------------------------|-------------------------------------------------------------------------------------------------------------------------------------|
| Jinzhong    | January 15, 2021 Suspension of offline teaching in primary and secondary schools and kindergartens                                                                                                                                                                                                                              | February 8, 2021 Territory-wide low risk                                                                                            |
| Tonghua     | January 18, 2021 City closure, restriction of motor vehicles other than military and police, etc., traffic control; closed management of residential homes                                                                                                                                                                      | February 20, 2021 Downgraded to low risk; rail, road, air recovery                                                                  |
| Haerbin     | January 18, 2021 Traffic control, neighborhood control, the city's cinemas and other enclosed places closed                                                                                                                                                                                                                     | February 18, 2021 Harbin city-wide low risk                                                                                         |
| Shanghai    | January 21, 2021 The risk level was adjusted upward, and the gathering place was suspended from business                                                                                                                                                                                                                        | February 19, 2021 Territory-wide low risk                                                                                           |
| Liuan       | May 13, 2021 Emergency plan, delineate the control area, the implementation of closed management                                                                                                                                                                                                                                | June 7, 2021 Territory-wide low risk, Epidemic prevention and control is normalized                                                 |
| Hefei       | May 14, 2021 Delineate the control area, the implementation of closed management                                                                                                                                                                                                                                                | June 7, 2021 Territory-wide low risk, Epidemic prevention and control is normalized                                                 |
| Guangzhou   | May 21, 2021 Guangzhou suspended all campus gathering activities, graded classification epidemic control                                                                                                                                                                                                                        | June 28, 2021 Adjusted to low risk, bus, subway, and passenger stations resume; schools resume offline teaching; resume dine-in     |
| Shenzhen    | May 30, 2021 Shenzhen suspended all campus gathering activities                                                                                                                                                                                                                                                                 | June 23, 2021 Resume normal operations; resume provincial control                                                                   |
| Foshan      | May 30, 2021 Foshan to implement the classification of prevention and control measures                                                                                                                                                                                                                                          | July 6, 2021 Airport resumes operations with low risk across the region                                                             |
| Dongguan    | June 18, 2021 Closed control areas of the district to implement closed management, suspend offline teaching; public cultural and sports venues closed                                                                                                                                                                           | June 27, 2021 Territory-wide low risk, resume provincial control                                                                    |
| Nanjing     | July 21, 2021 City-wide traffic control, public transportation, long-distance passenger stations, flight suspension; public places suspended business, suspend the gathering activities                                                                                                                                         | August 19, 2021 Territory-wide low risk; Resumption of public transportation, long-distance passenger transportation, flights, etc. |
| Yangzhou    | July 24, 2021 Closure of residential areas; transportation control; designation of control areas; closure of gathering places                                                                                                                                                                                                   | September 4, 2021 Territory-wide low risk                                                                                           |
| Zhuhai      | July 26, 2021 Implementation of graded and classified prevention and control measures                                                                                                                                                                                                                                           | August 18, 2021 Unblocked and low risk across the board                                                                             |
| Zhangjiajie | July 29, 2021 Closure of gathering places, scenic spots; closure of residential areas; control of stations and public transportation                                                                                                                                                                                            | August 20, 2021 Risk level downgraded, low risk across the region                                                                   |
| Zhengzhou   | July 30, 2021 Citywide community closed-loop management, non-essential places to suspend business                                                                                                                                                                                                                               | August 23, 2021 Sealed control area unsealed, low risk across the region                                                            |
| Jingzhou    | August 2, 2021 Non-essential places to suspend business; urban cruising cabs, net cars, passenger transport suspended operations                                                                                                                                                                                                | August 15, 2021 Territory-wide low risk                                                                                             |
| Kaifeng     | August 6, 2021 Passenger Terminal Closure                                                                                                                                                                                                                                                                                       | August 27, 2021 Territory-wide low risk                                                                                             |
| Shangqiu    | August 7, 2021 Buses, cabs, online cars, passenger shuttles suspended                                                                                                                                                                                                                                                           | September 3, 2021 Blocked area unblocked, Territory-wide low risk                                                                   |
| Jinmen      | August 4, 2021 Closed management of residential areas; part of the temporary suspension of public transport; non-essential places closed                                                                                                                                                                                        | August 23, 2021 Blocked area unblocked, Territory-wide low risk                                                                     |
| Putian      | September 13, 2021 Primary and secondary schools and kindergartens suspended offline teaching, the city's closed-loop management; long-distance buses, some trains suspended                                                                                                                                                    | October 2, 2021 Return to normal, Territory-wide low risk                                                                           |
| Quanzhou    | September 11, 2021 Implementation of hierarchical classification of prevention and control                                                                                                                                                                                                                                      | September 28, 2021 Blocked area unblocked, Territory-wide low risk                                                                  |
| Xiamen      | September 13, 2021 The city's primary and secondary schools and kindergartens to suspend offline teaching; long-distance passenger transport suspended; the city's residential district to implement closed-loop management; all parks, scenic spots, etc. suspended open to the public; the dinners unit to cancel the dine-in | October 29, 2021 Blocked area unblocked, Territory-wide low risk                                                                    |
| Zhangzhou   | September 19, 2021 The risk level was adjusted upward, and the gathering place was suspended from business                                                                                                                                                                                                                      | September 29 2021 Return to normal, Territory-wide low risk                                                                         |
| Haerbin     | September 21, 2021 The city's primary and secondary schools, kindergarten schools online teaching; confined places to suspend business; some trains suspended                                                                                                                                                                   | October 14, 2021 Territory-wide low risk                                                                                            |

|              |                                                                                                                                                                                                                                                          |                                                                           |
|--------------|----------------------------------------------------------------------------------------------------------------------------------------------------------------------------------------------------------------------------------------------------------|---------------------------------------------------------------------------|
| Suihua       | September 23, 2021 Gathering places are closed for business, Grading and classification of prevention and control                                                                                                                                        | October 8, 2021 Territory-wide low risk                                   |
| Huhehaote    | October 23, 2021 Close confined places, cancel large events; primary and secondary schools, kindergartens closed management                                                                                                                              | November 1, 2021 Return to normal, Territory-wide low risk                |
| Lanzhou      | October 19, 2021 Cultural and tourism business premises and business activities are suspended; emergency suspension of primary and secondary schools, closed management of higher education institutions; closed management of various residential areas | November 16, 2021 Blocked area unblocked, back to normal                  |
| Yinchuan     | October 17, 2021 Suspension of offline large-scale activities, public places closed management; primary and secondary schools and kindergartens closed                                                                                                   | November 4, 2021 Blocked area unblocked, back to normal                   |
| Haidong      | October 21, 2021 Gathering places are closed for business, Grading and classification of prevention and control                                                                                                                                          | November 4, 2021 Release of control, Territory-wide low risk              |
| Beijing      | October 22, 2021 Some areas closed for classes and closure; some bus operations suspended                                                                                                                                                                | November 16, 2021 All neighborhoods are unblocked and normal life resumes |
| Zunyi        | October 21, 2021 Risk level up, confined places to suspend business                                                                                                                                                                                      | November 3, 2021 Blocked area unblocked, back to normal                   |
| Xining       | October 28, 2021 Grading and classification of prevention and control                                                                                                                                                                                    | November 15, 2021 Blocked area unblocked, Territory-wide low risk         |
| Heihe        | October 28, 2021 Closed area management; bus, taxi shutdown, traffic control in some areas                                                                                                                                                               | November 22, 2021 Blocked area unblocked, Epidemic normalization          |
| Shangrao     | October 30, 2021 Closed-loop management, some neighborhood closures; some road traffic restrictions                                                                                                                                                      | November 12, 2021 Territory-wide low risk                                 |
| Chongqing    | November 1, 2021 Many districts and counties to suspend the operation of confined places, the implementation of graded classification control                                                                                                            | November 14, 2021 Blocked area unblocked, Territory-wide low risk         |
| Chengdu      | November 2, 2021 Gathering places are closed for business, Grading and classification of prevention and control                                                                                                                                          | November 14, 2021 Blocked area unblocked, Territory-wide low risk         |
| Tianshui     | November 4, 2021 Gathering places are closed for business, Grading and classification of prevention and control                                                                                                                                          | November 16, 2021 Territory-wide low risk                                 |
| Shijiazhuang | November 6, 2021 City-wide state of emergency and suspension of major events                                                                                                                                                                             | November 22, 2021 Territory-wide low risk                                 |
| Haerbin      | November 6, 2021 Online teaching in primary and secondary schools, some subway stations suspended operations, some cultural venues closed                                                                                                                | November 17, 2021 Territory-wide low risk                                 |

**Table S2. The variation of multiple airborne pollutants in semi-lockdown and full lockdown cases.**

|               | PM <sub>2.5</sub> | PM <sub>10</sub> | SO <sub>2</sub> | CO      | NO <sub>2</sub> | O <sub>3</sub> |
|---------------|-------------------|------------------|-----------------|---------|-----------------|----------------|
| Overall       | -28.78%           | -27.92%          | -30.33%         | -23.12% | -34.12%         | 3.82%          |
| Full-lockdown | -34.38%           | -36.78%          | -42.16%         | -33.07% | -41.59%         | 12.71%         |
| Semi-lockdown | -26.77%           | -24.74%          | -26.09%         | -19.56% | -31.44%         | 0.63%          |

**Table S3. The variation of multiple airborne pollutants in northern and southern China.**

|       |               | PM <sub>2.5</sub> | PM <sub>10</sub> | SO <sub>2</sub> | CO      | NO <sub>2</sub> | O <sub>3</sub> |
|-------|---------------|-------------------|------------------|-----------------|---------|-----------------|----------------|
| North | Overall       | -31.79%           | -31.07%          | -33.77%         | -28.81% | -31.51%         | 10.44%         |
|       | Full-lockdown | -36.14%           | -37.99%          | -42.96%         | -37.43% | -37.90%         | 18.75%         |
|       | Semi-lockdown | -29.37%           | -27.23%          | -28.67%         | -24.02% | -27.96%         | 5.81%          |
| South | Overall       | -25.42%           | -24.39%          | -26.48%         | -16.76% | -37.05%         | -3.59%         |
|       | Full-lockdown | -29.97%           | -33.75%          | -40.18%         | -22.16% | -50.80%         | -2.39%         |
|       | Semi-lockdown | -24.55%           | -22.61%          | -23.87%         | -15.73% | -34.43%         | -3.82%         |

**Table S4. The variation of multiple airborne pollutants in different regions.**

|                 | PM <sub>2.5</sub> | PM <sub>10</sub> | SO <sub>2</sub> | CO      | NO <sub>2</sub> | O <sub>3</sub> |
|-----------------|-------------------|------------------|-----------------|---------|-----------------|----------------|
| Northwest China | -16.91%           | -32.00%          | -25.85%         | -26.13% | -35.76%         | 10.01%         |
| Northeast China | -30.49%           | -30.80%          | -25.66%         | -18.77% | -23.78%         | -2.53%         |
| Northern China  | -44.23%           | -32.49%          | -49.47%         | -44.28% | -33.92%         | 27.04%         |
| Eastern China   | -31.74%           | -24.15%          | -26.57%         | -15.00% | -26.51%         | -7.94%         |
| Southern China  | -22.85%           | -11.14%          | -4.37%          | -5.43%  | -27.40%         | 5.25%          |
| Southeast China | -30.54%           | -33.90%          | -35.92%         | -20.57% | -39.01%         | -7.13%         |

|                 |         |         |         |         |         |        |
|-----------------|---------|---------|---------|---------|---------|--------|
| Southwest China | -19.42% | -22.63% | -19.36% | -24.04% | -33.91% | -3.94% |
|-----------------|---------|---------|---------|---------|---------|--------|

**Table S5. The q-value and significance p of each natural and socioeconomic factor on PM<sub>2.5</sub> changes during lockdown.**

| variable               | q          | p           |
|------------------------|------------|-------------|
| Population density     | 0.25625309 | 0.084649826 |
| Per capita GDP         | 0.17627113 | 0.236615422 |
| Urban built-up areas   | 0.18164105 | 0.342139385 |
| Secondary industry     | 0.07485082 | 0.795926741 |
| Private vehicles       | 0.2776067  | 0.086348212 |
| Bus                    | 0.08973779 | 0.855993132 |
| Taxi                   | 0.32098842 | 0.059201074 |
| Electricity            | 0.29126249 | 0.067106982 |
| Industrial smoke       | 0.11667665 | 0.658472746 |
| Industrial electricity | 0.30166967 | 0.057052369 |
| Temperature            | 0.22523372 | 0.399558743 |
| RH                     | 0.41261528 | 0.001348716 |
| Precipitation          | 0.31873945 | 0.022686611 |
| Pressure               | 0.13249058 | 0.412810073 |
| Wind speed             | 0.23495289 | 0.136184461 |

**Table S6. The q-value and significance p of each natural and socioeconomic factor on PM<sub>10</sub> changes during lockdown.**

| variable               | q         | p           |
|------------------------|-----------|-------------|
| Population density     | 0.3754963 | 0.080482863 |
| Per capita GDP         | 0.2031465 | 0.576472701 |
| Urban built-up areas   | 0.2015836 | 0.461649509 |
| Secondary industry     | 0.1740789 | 0.26613054  |
| Private vehicles       | 0.3829376 | 0.022898782 |
| Bus                    | 0.2463255 | 0.227799395 |
| Taxi                   | 0.4239739 | 0.024818044 |
| Electricity            | 0.3096938 | 0.276035832 |
| Industrial smoke       | 0.2111655 | 0.433327522 |
| Industrial electricity | 0.3247304 | 0.111713479 |
| Temperature            | 0.467746  | 0.006223201 |
| RH                     | 0.4877357 | 0.009869729 |
| Precipitation          | 0.4101418 | 0.007755318 |
| Pressure               | 0.2808636 | 0.383858898 |
| Wind speed             | 0.1976512 | 0.130757021 |

**Table S7. The q-value and significance p of each natural and socioeconomic factor on SO<sub>2</sub> changes during lockdown.**

| variable               | q         | p           |
|------------------------|-----------|-------------|
| Population density     | 0.3336792 | 0.005124567 |
| Per capita GDP         | 0.2364133 | 0.199780158 |
| Urban built-up areas   | 0.1204732 | 0.62144743  |
| Secondary industry     | 0.1333479 | 0.676680374 |
| Private vehicles       | 0.2122849 | 0.160988704 |
| Bus                    | 0.1513292 | 0.49082178  |
| Taxi                   | 0.3246322 | 0.045415322 |
| Electricity            | 0.3453462 | 0.026331936 |
| Industrial smoke       | 0.2114794 | 0.27779951  |
| Industrial electricity | 0.2884494 | 0.025769825 |
| Temperature            | 0.2805884 | 0.055025728 |
| RH                     | 0.3296329 | 0.01922776  |
| Precipitation          | 0.345415  | 0.064541174 |
| Pressure               | 0.1188158 | 0.365165841 |
| Wind speed             | 0.2025309 | 0.225296978 |

**Table S8. The q-value and significance p of each natural and socioeconomic factor on CO changes during lockdown.**

| <b>variable</b>        | <b>q</b>   | <b>p</b>   |
|------------------------|------------|------------|
| Population density     | 0.22222763 | 0.41485481 |
| Per capita GDP         | 0.2446394  | 0.43865609 |
| Urban built-up areas   | 0.15942592 | 0.31461213 |
| Secondary industry     | 0.1817126  | 0.49245468 |
| Private vehicles       | 0.4495982  | 0.0220318  |
| Bus                    | 0.24721029 | 0.3080558  |
| Taxi                   | 0.17447866 | 0.61658155 |
| Electricity            | 0.20894632 | 0.31564834 |
| Industrial smoke       | 0.17855428 | 0.56743553 |
| Industrial electricity | 0.37781935 | 0.05587273 |
| Temperature            | 0.22481537 | 0.28427417 |
| RH                     | 0.28798862 | 0.07822534 |
| Precipitation          | 0.33363304 | 0.06249821 |
| Pressure               | 0.17894484 | 0.55509808 |
| Wind speed             | 0.14626143 | 0.30987951 |

**Table S9. The q-value and significance p of each natural and socioeconomic factor on NO<sub>2</sub> changes during lockdown.**

| <b>variable</b>        | <b>q</b>   | <b>p</b>   |
|------------------------|------------|------------|
| Population density     | 0.08234353 | 0.6974995  |
| Per capita GDP         | 0.0710827  | 0.76656099 |
| Urban built-up areas   | 0.19445895 | 0.06923705 |
| Secondary industry     | 0.12534097 | 0.47637984 |
| Private vehicles       | 0.11447401 | 0.5170978  |
| Bus                    | 0.13671376 | 0.40129384 |
| Taxi                   | 0.06440412 | 0.82140885 |
| Electricity            | 0.1234493  | 0.55540864 |
| Industrial smoke       | 0.14323405 | 0.24904874 |
| Industrial electricity | 0.14254706 | 0.34374802 |
| Temperature            | 0.34117666 | 0.04543127 |
| RH                     | 0.31622542 | 0.01288435 |
| Precipitation          | 0.34148417 | 0.01450756 |
| Pressure               | 0.17665272 | 0.16267301 |
| Wind speed             | 0.06780951 | 0.80284276 |

**Table S10. The q-value and significance p of each natural and socioeconomic factor on O<sub>3</sub> changes during lockdown.**

| <b>variable</b>        | <b>q</b>  | <b>p</b>   |
|------------------------|-----------|------------|
| Population density     | 0.2037777 | 0.37385833 |
| Per capita GDP         | 0.361404  | 0.08179644 |
| Urban built-up areas   | 0.2949269 | 0.01577863 |
| Secondary industry     | 0.2351306 | 0.10052357 |
| Private vehicles       | 0.3080108 | 0.09460722 |
| Bus                    | 0.2422    | 0.24846987 |
| Taxi                   | 0.3496782 | 0.08148005 |
| Electricity            | 0.3857156 | 0.04551656 |
| Industrial smoke       | 0.1374523 | 0.41919118 |
| Industrial electricity | 0.3402798 | 0.05191122 |
| Temperature            | 0.3105306 | 0.05333131 |
| RH                     | 0.3722889 | 0.01645511 |
| Precipitation          | 0.3681042 | 0.03633055 |
| Pressure               | 0.1784824 | 0.33897327 |
| Wind speed             | 0.2408258 | 0.15186725 |
